# Supplementary material for: Manipulating time-dependent size distribution of sulfur quantum dots and their fluorescence sensing for ascorbic acid
Source: Royal Society of Chemistry journal article supplement (doi:10.1039/d2dt01584f), 2022-01-01
Supplement: d2dt01584f1.pdf [file d2dt01584f1.pdf]

## Supporting Information

### **Manipulating time dependent size distribution of sulfur quantum dots and their fluorescent sensing for ascorbic acid**

*Zitong Wei<sup>†,a</sup>, Wenyi Lu<sup>†,a</sup>, Caiwen Pan<sup>a</sup>, Jiping Ni<sup>a</sup>, Haiyun Zhao<sup>b</sup>, Guoyong Huang<sup>\*,a</sup>, Chunxia Wang<sup>\*, a</sup>*

*<sup>a</sup> State Key Laboratory of Heavy Oil Processing, College of New Energy and Materials, China University of Petroleum (Beijing), Beijing 102249, China*

*<sup>b</sup> China Shandong Institute for Food and Drug Control, Jinan, 250101, China*

\*Correspondence to: E-mail: [cxwang@iccas.ac.cn](mailto:cxwang@iccas.ac.cn); [huanggy@cup.edu.cn](mailto:huanggy@cup.edu.cn).

<sup>†</sup> These two authors contribute equally.

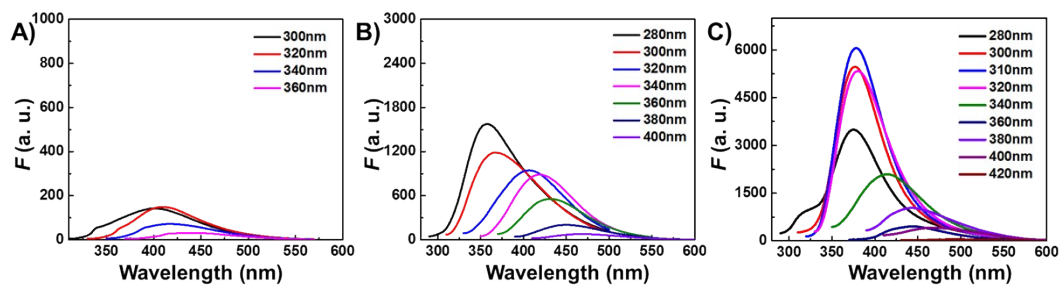

**Fig. S1.** Photoluminescence spectra of the SQDs prepared from different solvents (A) NaOH, (B) water, (C) ethanol under same conditions (80 mg sulfur powder, 3.0 mL H<sub>2</sub>O<sub>2</sub>, 1.5 mL PEG). Temperature: 220 °C

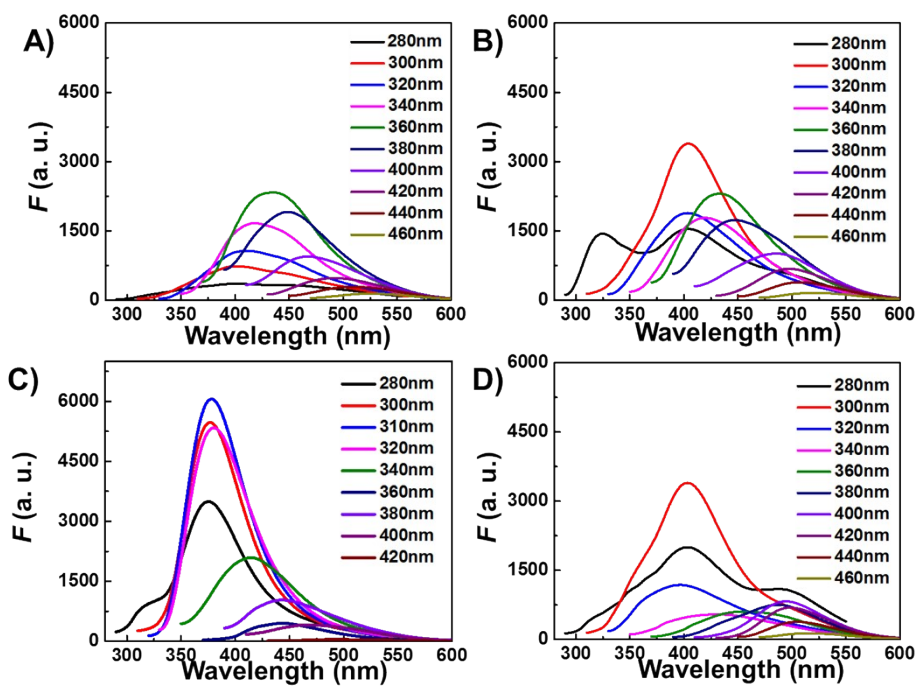

**Fig S2.** PL spectra of SQDs-36 sample obtained from the reaction using different amount of  $\text{H}_2\text{O}_2$ . (A) 0 mL  $\text{H}_2\text{O}_2$  (B) 1.5 mL  $\text{H}_2\text{O}_2$  (C) 3.0 mL  $\text{H}_2\text{O}_2$  (D) 5.0 mL  $\text{H}_2\text{O}_2$  Other condition: 80 mg sulfur powders + 1.5 mL PEG-400 + 30 mL ethanol, temperature: 220 °C

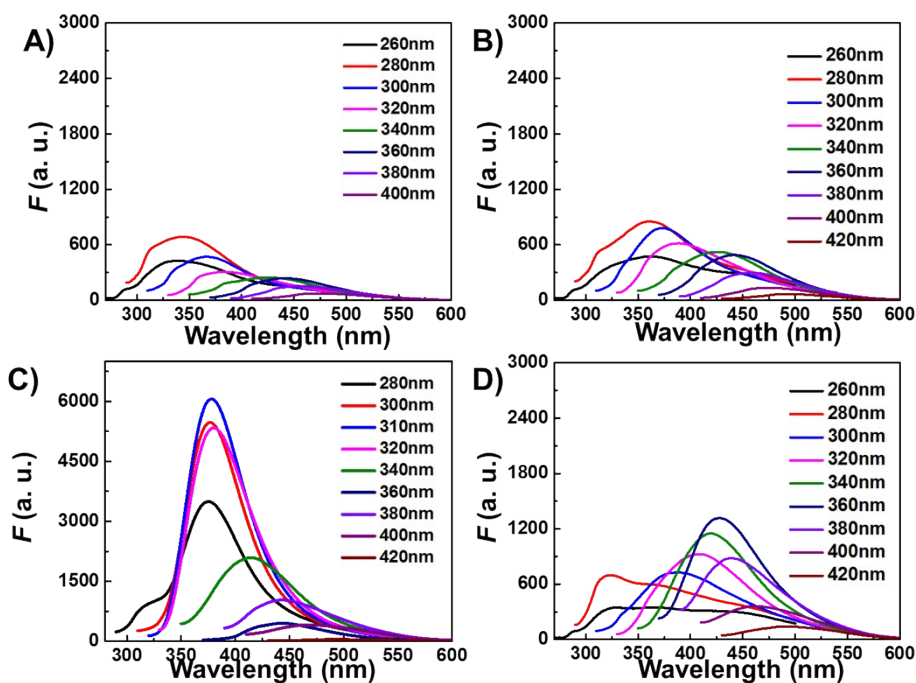

**Fig S3.** PL spectra of SQDs-36 sample obtained from the reaction using different amount of PEG-400. (A) 0 mL PEG-400 (B) 0.5 mL PEG-400 (C) 1.5 mL PEG-400 (D) 3.0 mL PEG-400. Other condition: 80 mg sulfur powders + 3.0 mL H<sub>2</sub>O<sub>2</sub> + 30 mL ethanol, temperature: 220 °C.

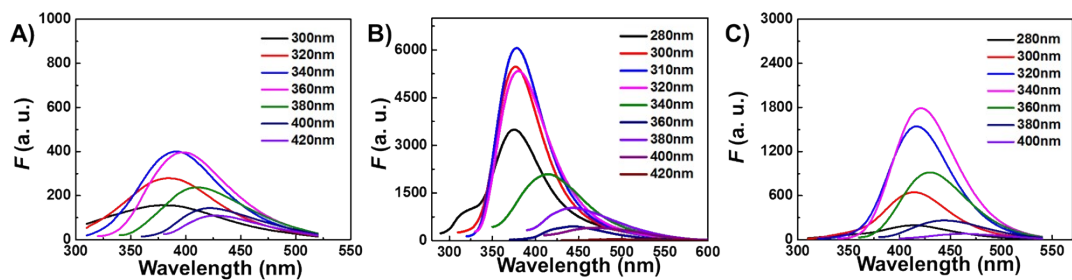

**Fig S4.** PL spectra of SQDs-36 obtained from the reaction using different amount of sulfur powders. (A) 40 mg sulfur powders (B) 80 mg sulfur powders (C) 120 mg sulfur powders. Other condition: 1.5 mL PEG-400 + 3.0 mL H<sub>2</sub>O<sub>2</sub> + 30 mL ethanol, temperature: 220 °C.

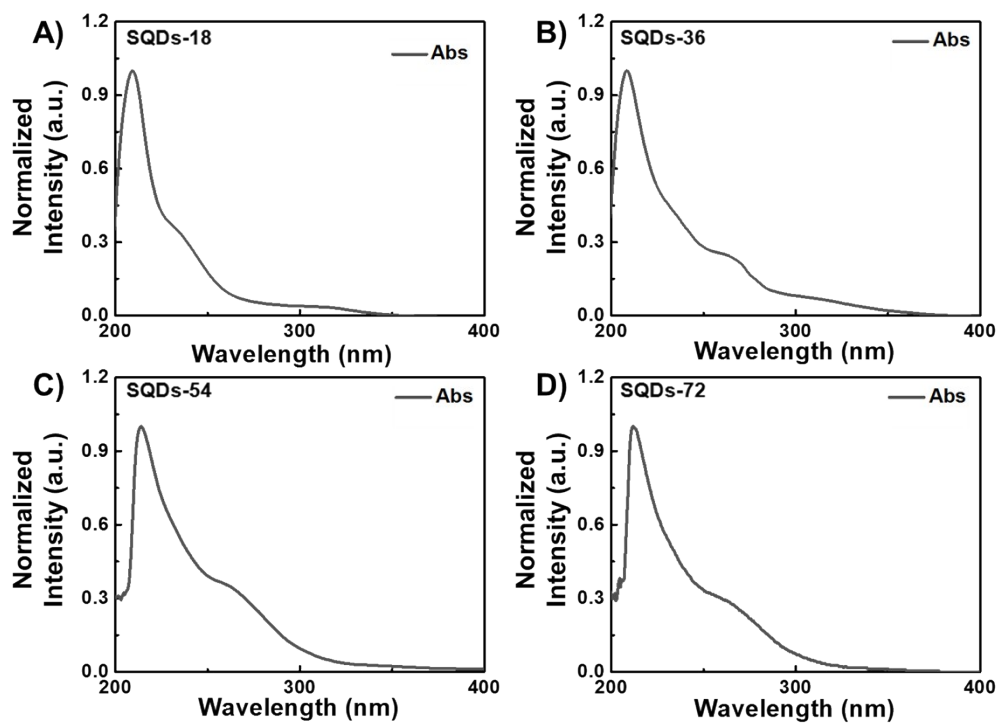

**Fig S5.** Normalized absorption spectra of (A) SQDs-18, (B) SQDs-36, (C) SQDs-54, (D) SQDs-72.

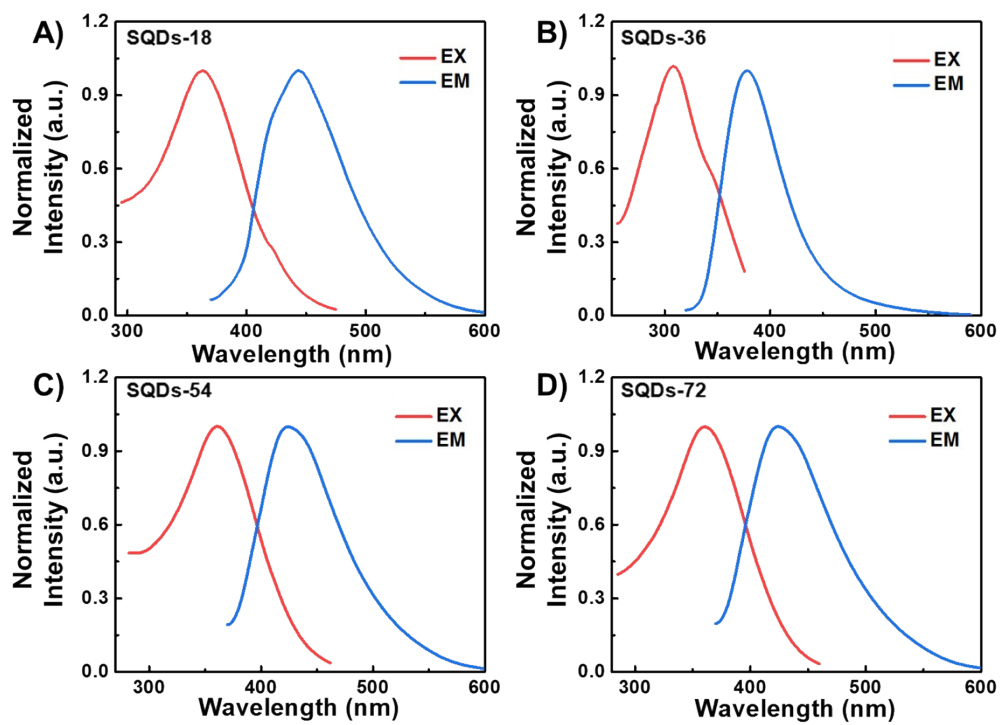

**Fig S6.** Normalized excitation (Ex., red curve), and emission (Em., blue curve) spectra of (A) SQDs-18, (B) SQDs-36, (C) SQDs-54, (D) SQDs-72.

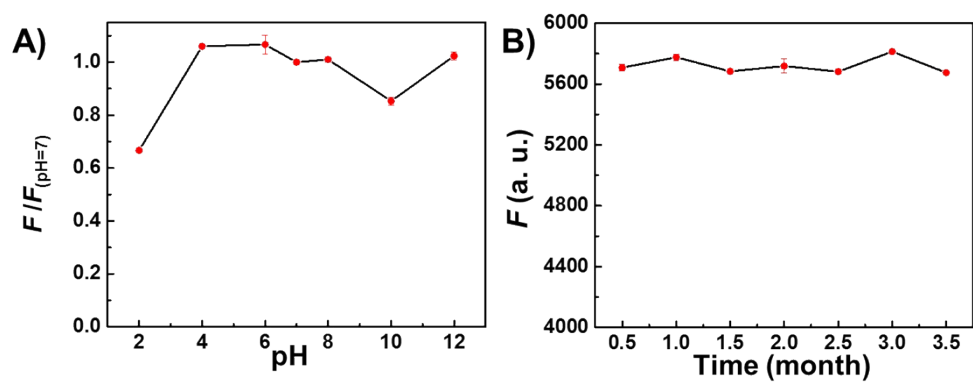

**Fig S7.** (A)  $F/F_{(pH=7)}$  of SQDs-36 when pH switch from 2 to 12. (B) Time dependent fluorescence of SQDs-36.



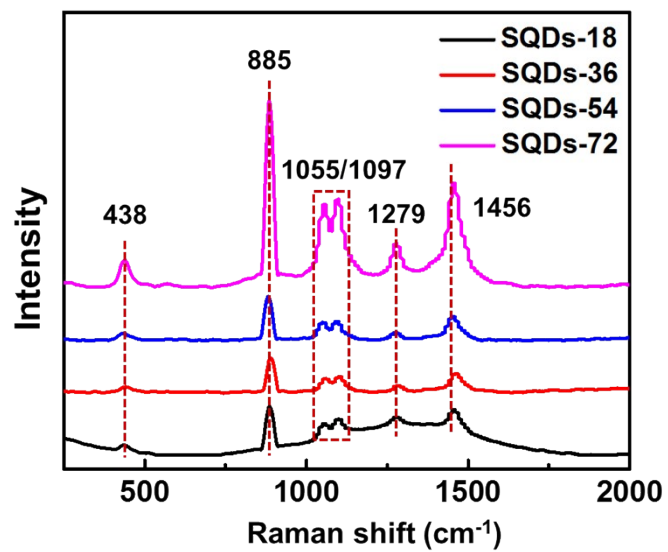

**Fig. S8.** Raman spectrum of SQDs-18 (black curve), SQDs-36 (red curve), SQDs-54 (blue curve) and SQDs-72 (pink curve).

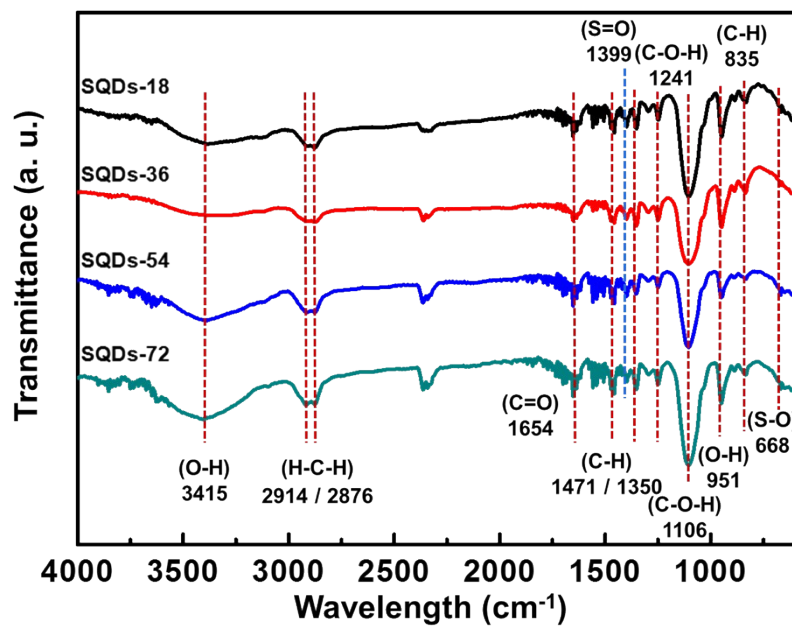

**Fig S9.** FT-IR of SQDs-18 (black curve), SQDs-36 (red curve), SQDs-54 (blue curve) and SQDs-72 (green curve).

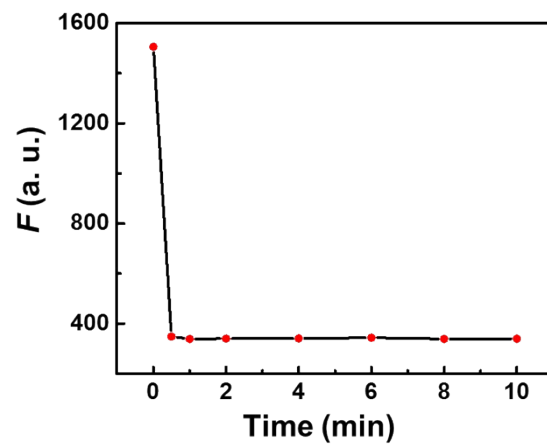

**Fig S10.** PL stability of SQDs-72 towards CoOOH nanosheets.

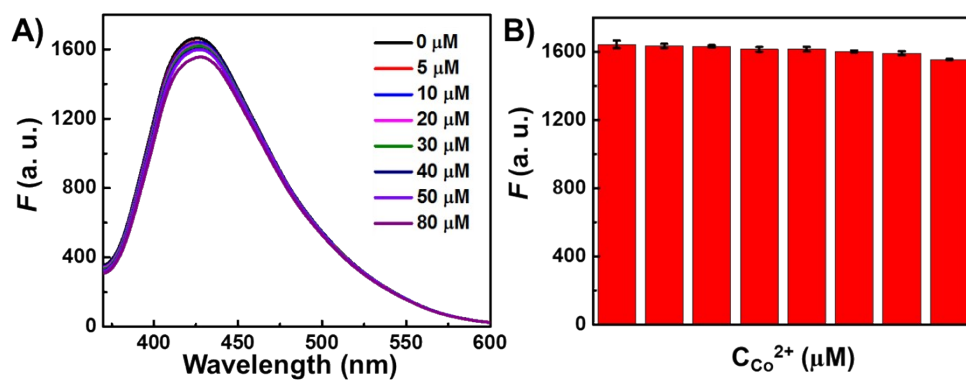

**Fig S11.** (A) PL property and (B) column of SQDs versus the concentration of  $\text{CoCl}_2$  (0, 5, 10, 20, 30, 40, 50, and 80  $\mu\text{M}$ ). Excitation: 360 nm.

**Table S1.** Absorption band of SQDs samples at different reaction times.

| <b>Reaction Time</b> | <b>band I</b> | <b>band II</b> | <b>band III</b> |
|----------------------|---------------|----------------|-----------------|
| <b>18 h</b>          | <b>208 nm</b> | <b>240 nm</b>  | <b>318 nm</b>   |
| <b>36 h</b>          | <b>209 nm</b> | <b>268 nm</b>  | <b>312 nm</b>   |
| <b>54 h</b>          | <b>213 nm</b> | <b>265 nm</b>  | <b>-</b>        |
| <b>72 h</b>          | <b>213 nm</b> | <b>264 nm</b>  | <b>-</b>        |

**Table S2.** The content of atomic sulphur and oxidized sulphur species of S<sub>2</sub>p for different times.

| <b>Reaction times (h)</b>       | <b>18 h</b> | <b>36 h</b>  | <b>54 h</b>  | <b>72 h</b>  |
|---------------------------------|-------------|--------------|--------------|--------------|
| <b>atomic sulphur</b>           | <b>36%</b>  | <b>23.3%</b> | <b>21.5%</b> | <b>34.4%</b> |
| <b>oxidized sulphur species</b> | <b>64%</b>  | <b>76.7%</b> | <b>78.5%</b> | <b>65.3%</b> |
